# Supplementary material for: A series of ligustrazine platinum(iv) complexes with potent anti-proliferative and anti-metastatic properties that exert chemotherapeutic and immunotherapeutic effects
Source: Royal Society of Chemistry journal article supplement (doi:10.1039/d3dt02358c), 2023-01-01
Supplement: d3dt02358c1.pdf [file d3dt02358c1.pdf]

Supporting Information for

**A series of ligustrazine platinum(IV) complexes with potent anti-proliferative and anti-metastatic properties by causing chemotherapeutic and immunotherapeutic effects**

Yan Chen<sup>a</sup>, Linming Li<sup>b</sup>, Zhifang Liu<sup>b</sup>, Meifeng Liu<sup>a\*</sup>, Qingpeng Wang<sup>b\*</sup>.

a. Key Laboratory of Functional Molecular Engineering of Guangdong Province, School of Chemistry and Chemical Engineering, South China University of Technology, Guangzhou 510640, China.

b. Institute of Biopharmaceutical Research, Liaocheng University, Liaocheng 252059, P.R. China.

\* Corresponding authors:

E-mail address: [liumf@scut.edu.cn](mailto:liumf@scut.edu.cn) (M. Liu), [lywqp@126.com](mailto:lywqp@126.com) (Q. Wang).

**Contents**

|                                                                                               |   |
|-----------------------------------------------------------------------------------------------|---|
| 1. Supporting information for synthesis of the title compounds .....                          | 2 |
| 2. Supporting information for anti-metastasis activities <i>in vitro</i> .....                | 3 |
| 3. Supporting information for reduction and DNA binding properties of compound <b>4</b> ..... | 4 |
| 4. Supporting information for ROS generation .....                                            | 4 |
| 5. <sup>1</sup> H NMR, <sup>13</sup> C NMR, MS and HRMS spectra .....                         | 6 |

## 1. Supporting information for synthesis of the title compounds

### 1.1 Preparation of compound **O1**

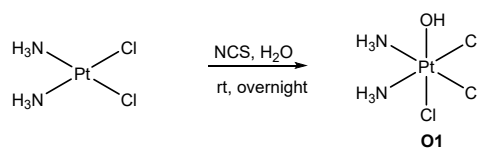

Cisplatin (0.75 g, 2.5 mmol) was suspended in distilled water 150 mL and stirred at room temperature. *N*-chloro succinimide (NCS) solution (0.40 g, 3 mmol) in distilled water 150 mL was added to reaction system dropwise and the resultant mixture was stirred overnight at room temperature. After that, the solid was filtrated and the solution was concentrated under vacuum. The residue was washed with ethanol and ethylether. The product **O1** was obtained as a yellow solid (0.46 g, 52%).

### 1.2 Preparation of compound **O2**

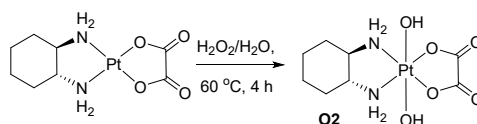

A suspension of oxaliplatin (1.0 g, 2.5 mmol) in distilled water 30 mL was stirred at room temperature. Then H<sub>2</sub>O<sub>2</sub> (30%) 50 mL was added drop wise. The mixture was kept stirring for 4 h at 60 °C. Then the resultant mixture was recrystallized at 4 °C. Crude product as yellow solid was obtained after filtration. Then recrystallization in water affords pure oxoplatin **O2** as white needles (0.9 g, 79%).

### 1.3 Preparation of compound **O3**

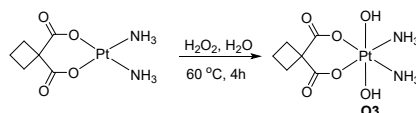

A suspension of carboplatin (0.93 g, 2.5 mmol) in distilled water 30 mL was stirred at room temperature. Then H<sub>2</sub>O<sub>2</sub> (30%) 50 mL was added drop wise. The mixture was kept stirring for 4 h at 60 °C. Then the resultant mixture was recrystallized at 4 °C. Crude product as yellow solid was obtained after filtration. Then recrystallization in water afford pure oxoplatin **O3** as white solid (0.84 g, 83%).

### 1.4 Preparation of compound **O4**

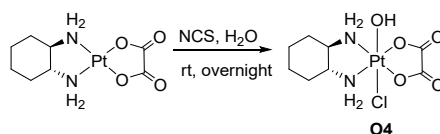

Oxaliplatin (1.0 g, 2.5 mmol) was suspended in distilled water 150 mL and stirred at room temperature. *N*-chloro succinimide (NCS) solution (0.392 g, 2.94 mmol) in distilled water 150 mL was added to reaction system dropwise and the resultant mixture was stirred overnight at room temperature. After that, the solid was filtrated and the solution was concentrated under vacuum. The residue was washed with ethanol and ethylether. The product was obtained as a yellow solid (1.0 g, 84%).

### 1.5 Preparation of compound **O5**

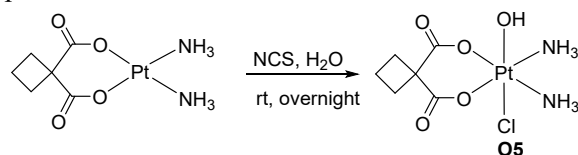

Carboplatin (0.93 g, 2.5 mmol) was suspended in distilled water 150 mL and stirred at room temperature. *N*-chloro succinimide (NCS) solution (0.400 g, 3.0 mmol) in distilled water 150 mL was added to reaction system dropwise and the resultant mixture was stirred overnight at room temperature. After that, the solid was filtrated and the solution was concentrated under vacuum. The residue was washed with ethanol and ethylether. The product **O5** was obtained as a yellow solid (0.58 g, 55%).

## 2. Supporting information for anti-metastasis activities *in vitro*

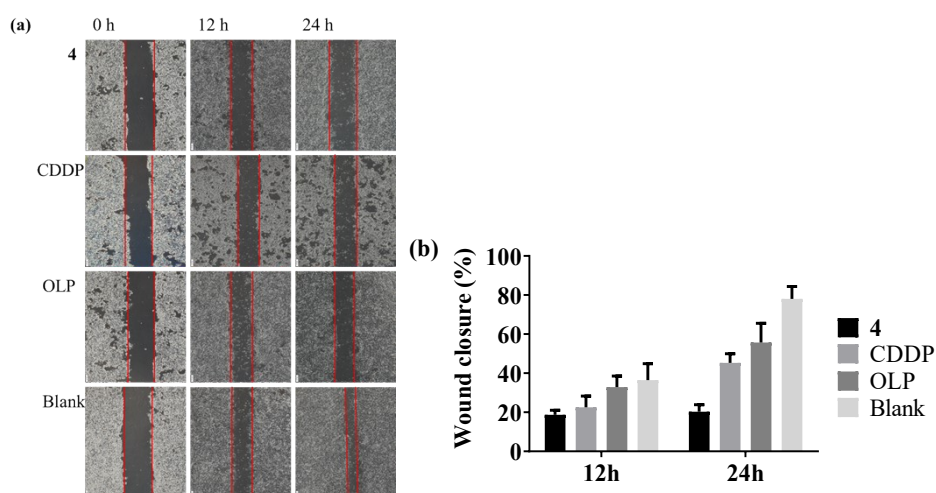

**Figure S1** Migration inhibition of complex **4**, CDDP and OLP at 10  $\mu$ M to 4T1 cells *in vitro*. The extent of wound healing was observed at 0 h, 12 h, and 24 h. (a) Representative images. (b) Analysis of wound closure.

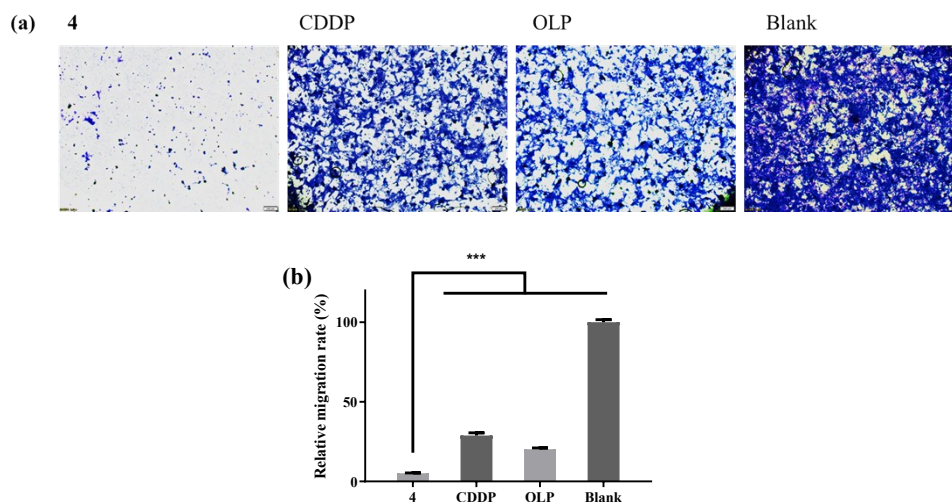

**Figure S2** Evaluation of migration inhibition properties of complex **4**, CDDP and OLP (10  $\mu$ M) to 4T1 cells using transwell assay *in vitro*. The tumor cells were treated with and without platinum complexes for 24 h. (a) Representative images. (b) Analysis of relative migration rate. \*\*\* $P < 0.001$ .

### 3. Supporting information for reduction and DNA binding properties of compound **4**

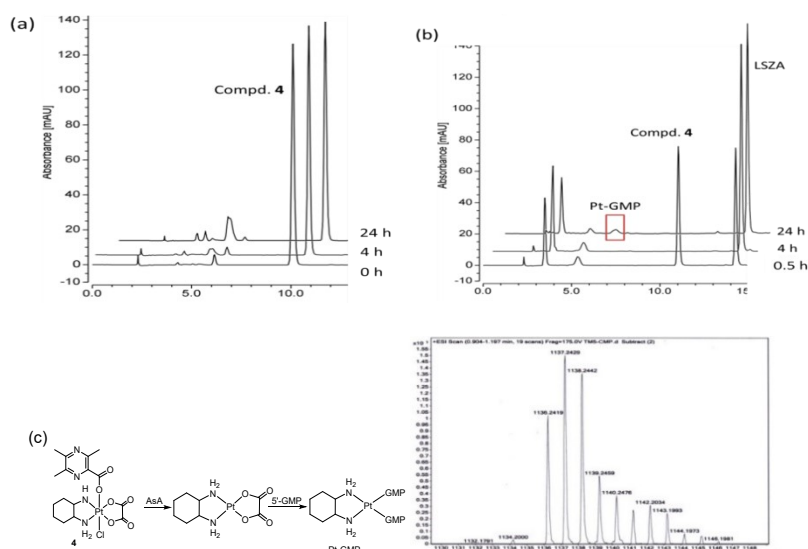

**Figure S3** The reduction of compound **4** in the presence of AsA, and its interaction with DNA. (a) Compound **4** (0.5 mM) in PBS incubated for 24 h at 37  $^{\circ}$ C. (b) Solution of compound **4** (0.5 mM), AsA (1 mM) and GMP (3 mM) in PBS incubated for 24 h at 37  $^{\circ}$ C. (c) HRMS of Pt-GMP. Reprinted with permission from Wang et al., Dalton Trans. 2016, 45, 10366–10374. Copyright 2016 The Royal Society of Chemistry [S1]

### 4. Supporting information for ROS generation

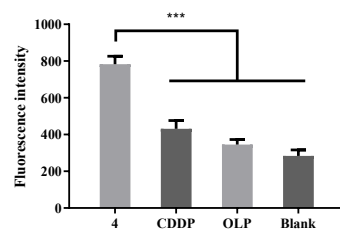

**Figure S4** Staining of ROS with DCFH-DA in A549 cells treated by platinum complexes. A549 cells were incubated with and without compounds **4**, CDDP and OLP (10  $\mu$ M) for 24 h at 37  $^{\circ}$ C, and stained by DCFH-DA. The ROS production was quantified by flow cytometry. \*\*\* $P < 0.001$ .

## 5. $^1\text{H}$ NMR, $^{13}\text{C}$ NMR, MS and HRMS spectra

1H-LDC-LLM-20220929 CIS-CXQ-OH

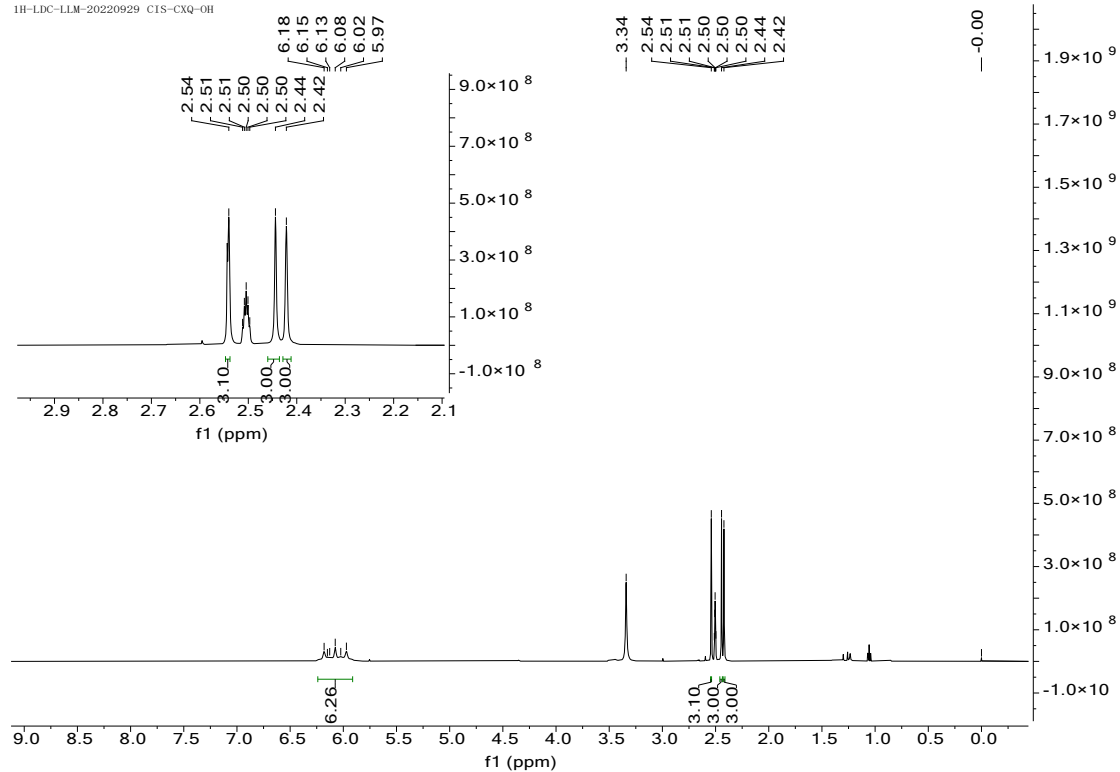

Figure S6  $^1\text{H}$  NMR spectrum for complex 1.

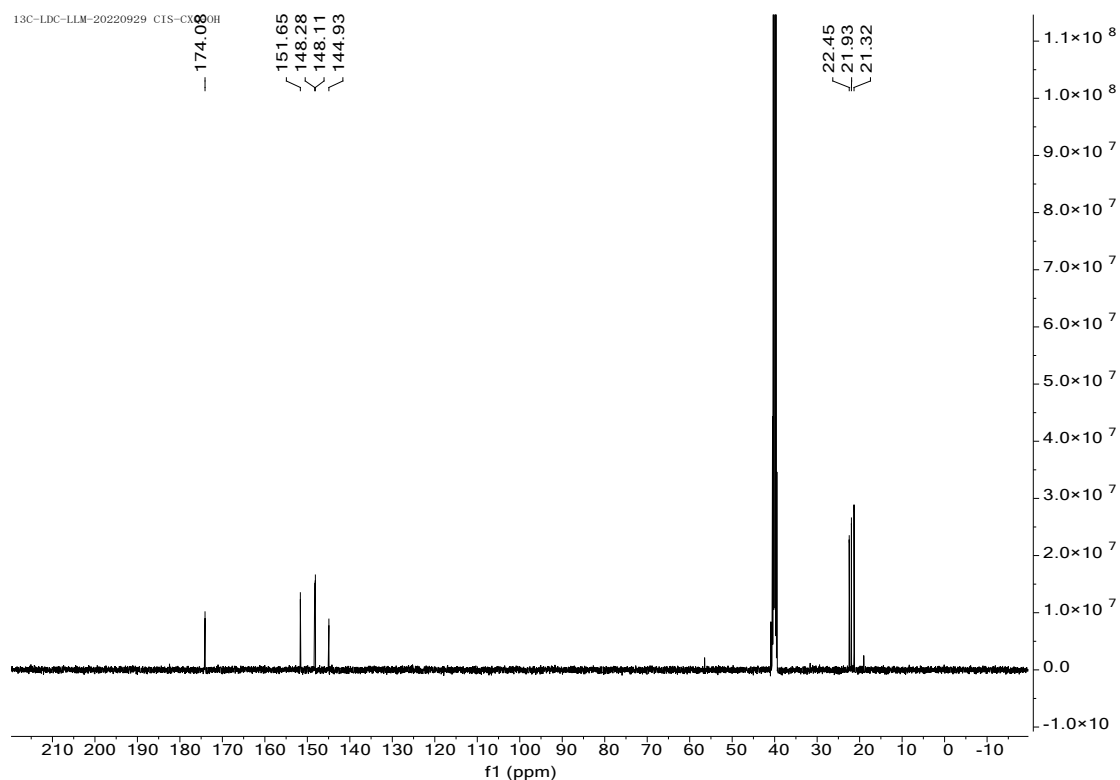

Figure S7  $^{13}\text{C}$  NMR spectrum for complex 1.

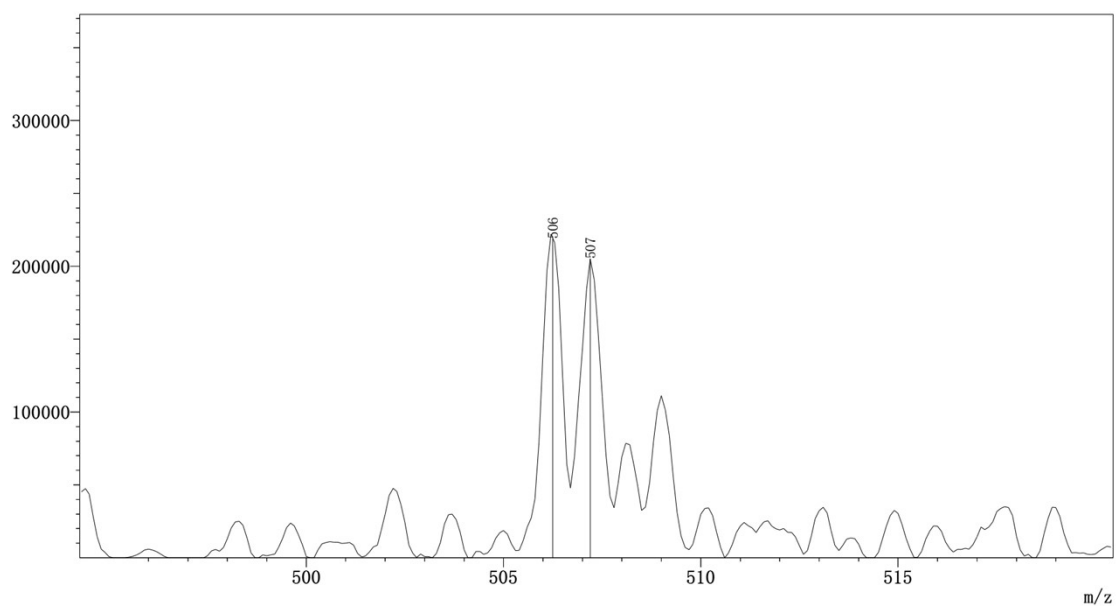

**Figure S8** ESI-MS spectrum for complex 1.

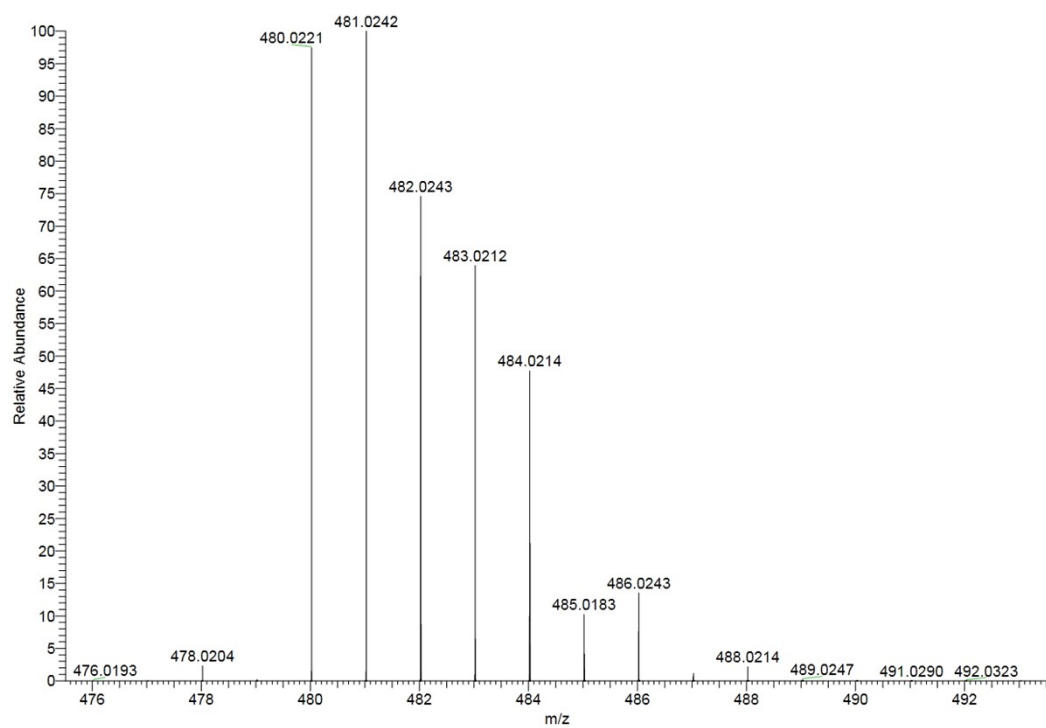

**Figure S9** HRMS spectrum for complex 1.

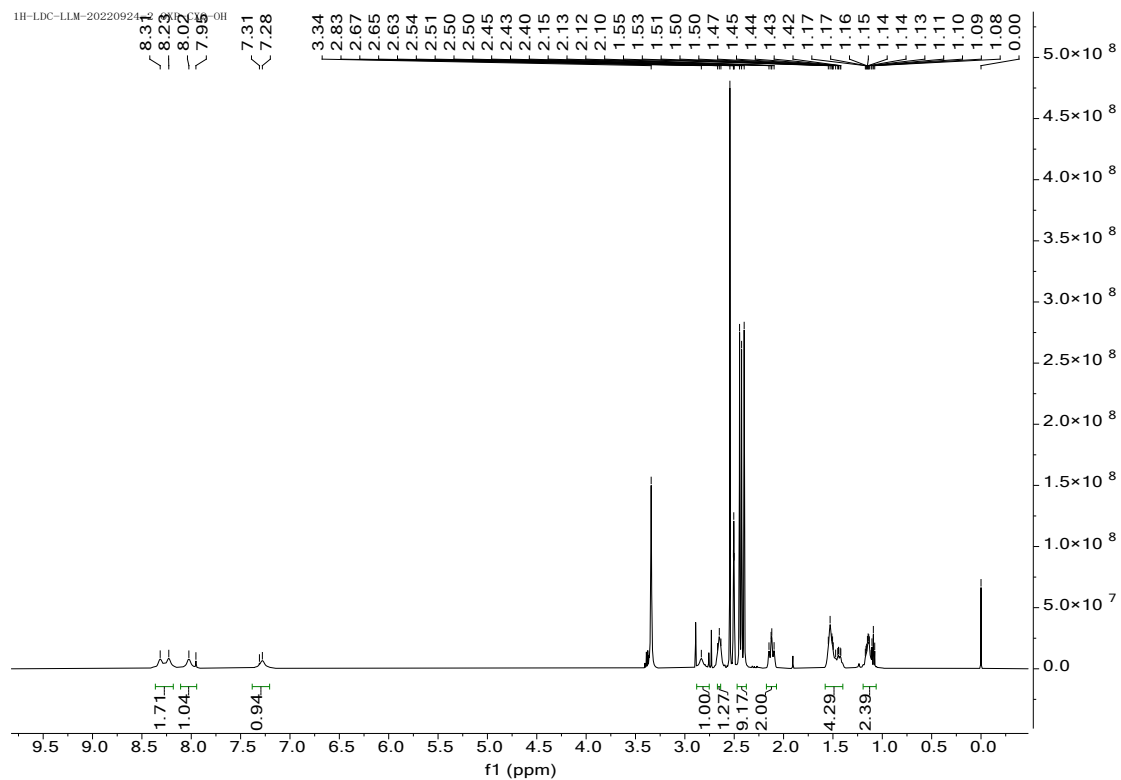

Figure S10 <sup>1</sup>H NMR spectrum for complex 2.

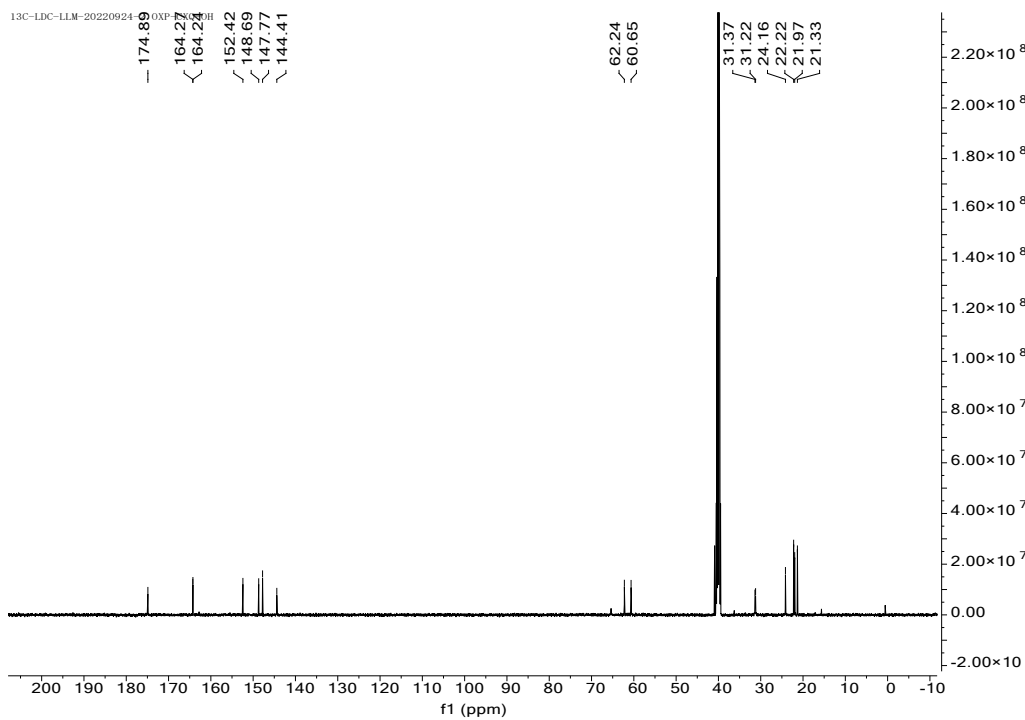

Figure S11 <sup>13</sup>C NMR spectrum for complex 2.



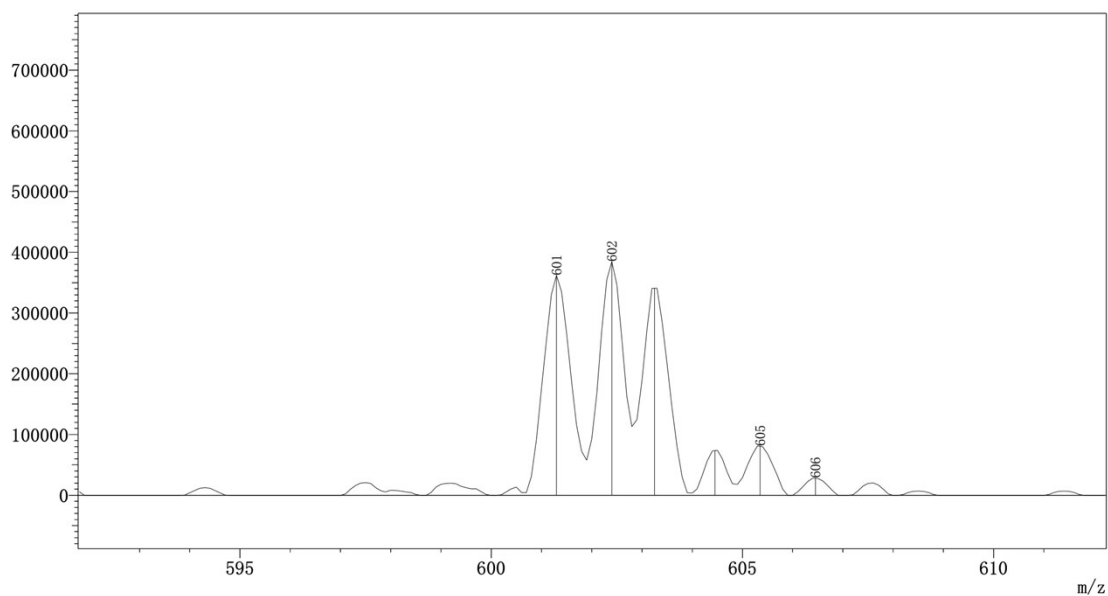

Figure S12 ESI-MS spectrum for complex 2.

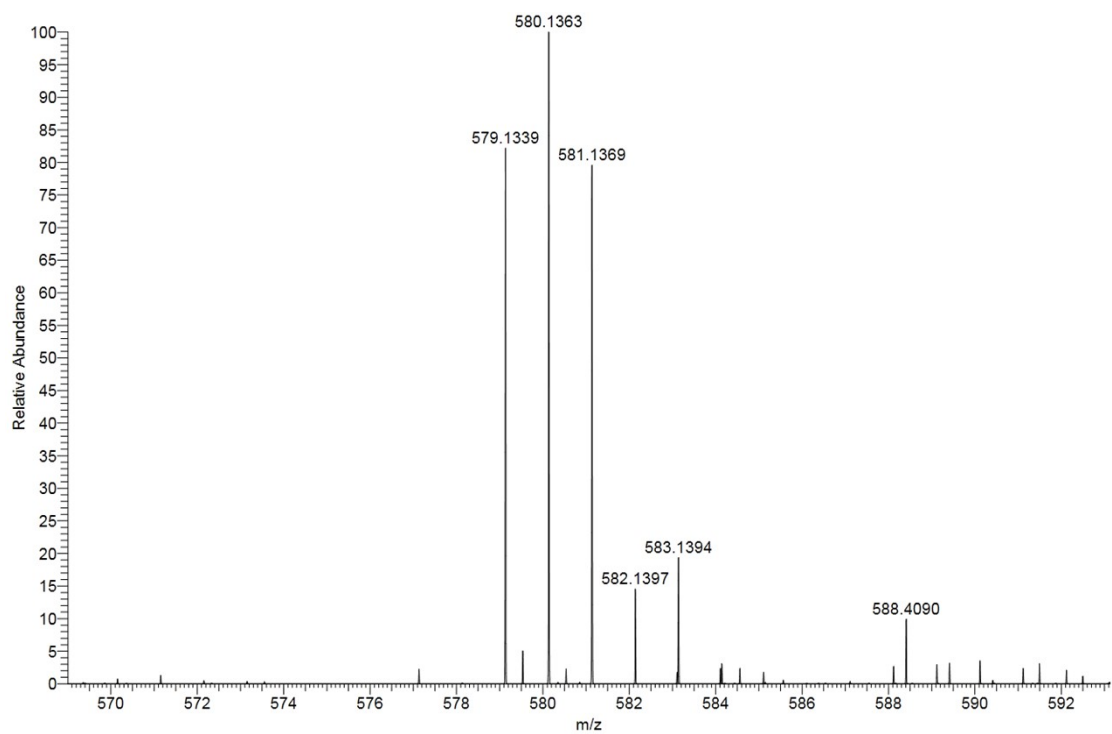

Figure S13 HRMS spectrum for complex 2.

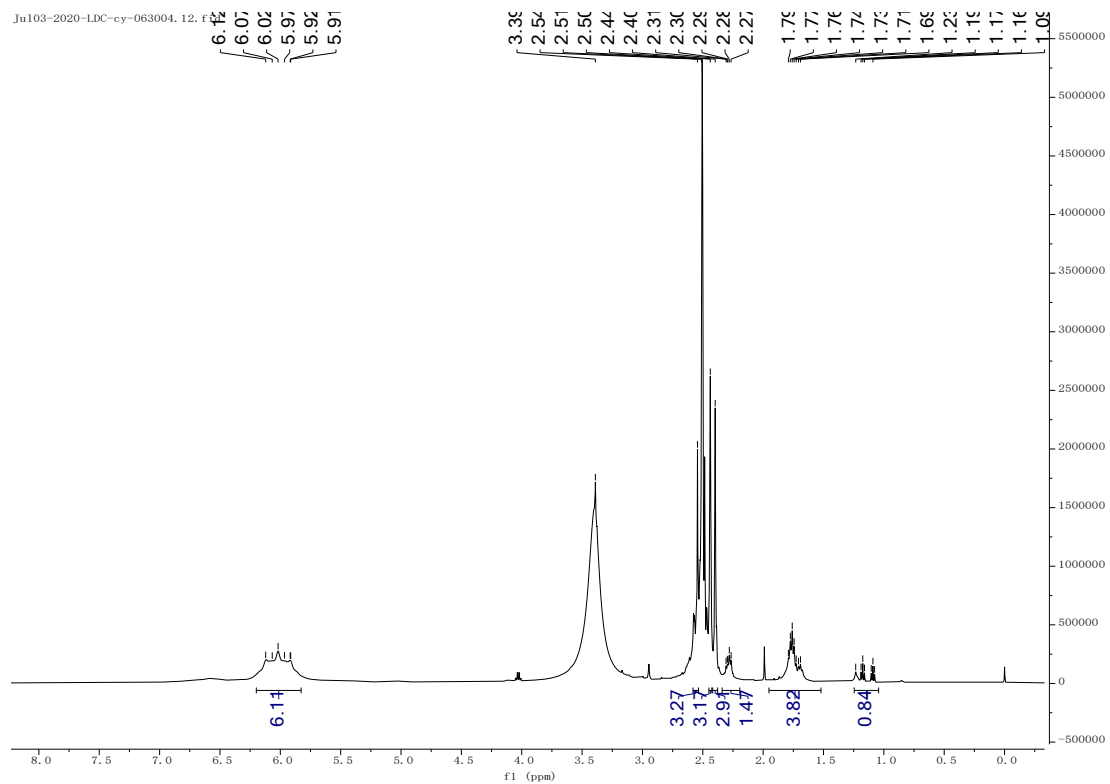

Figure S14  $^1\text{H}$  NMR spectrum for complex 3.

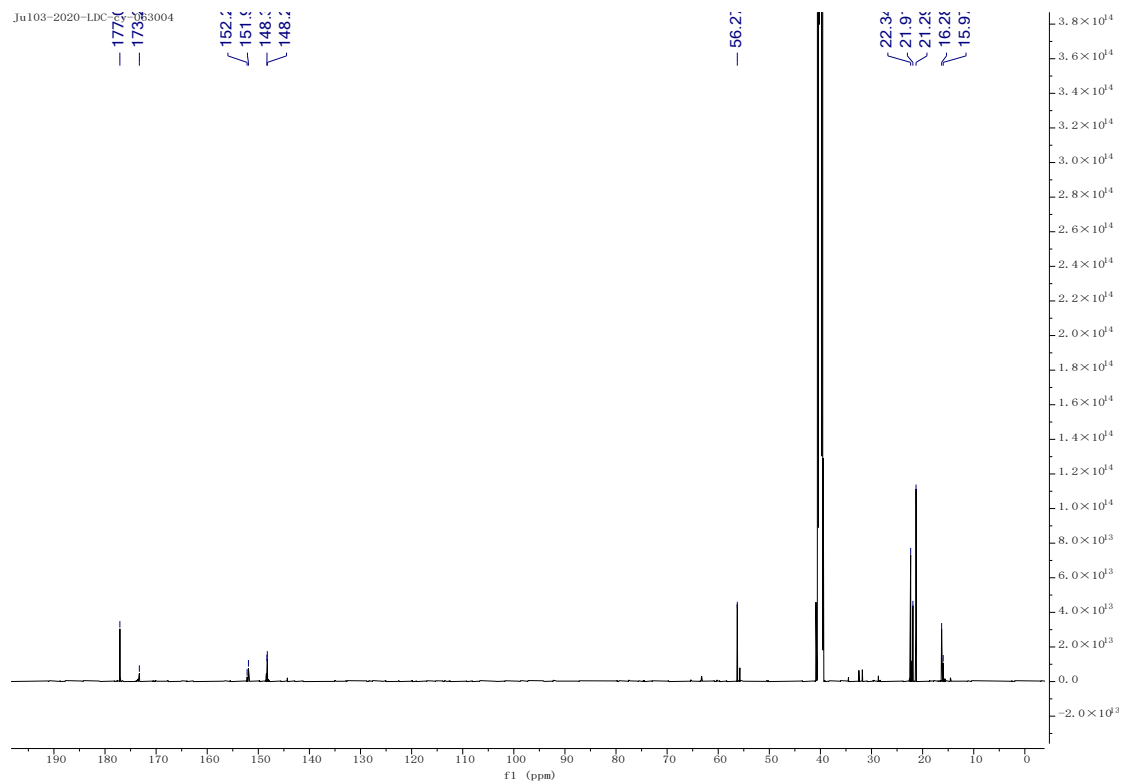

Figure S15  $^{13}\text{C}$  NMR spectrum for complex 3.

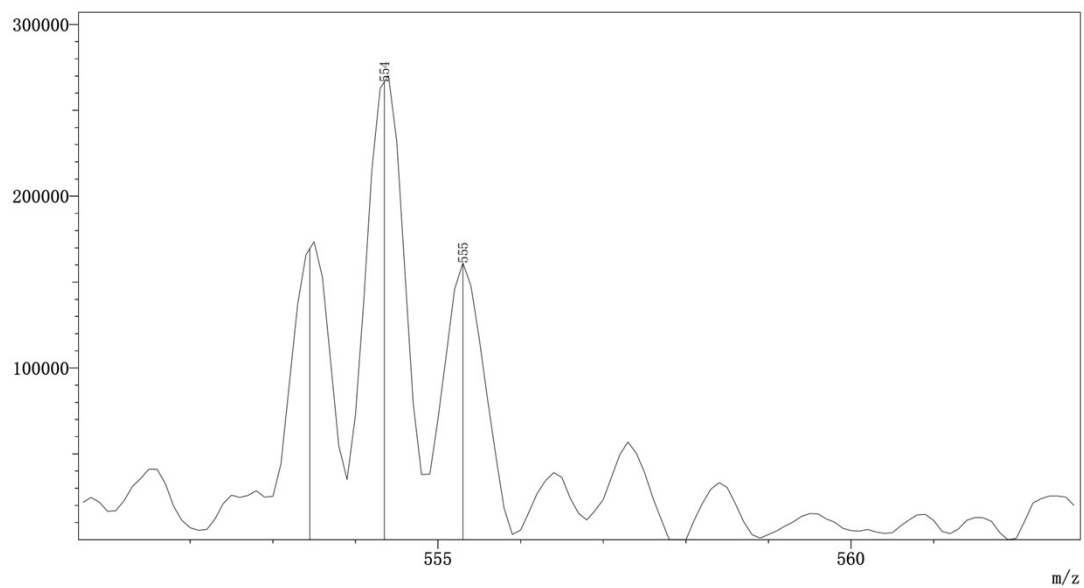

**Figure S16** ESI-MS spectrum for complex 3.

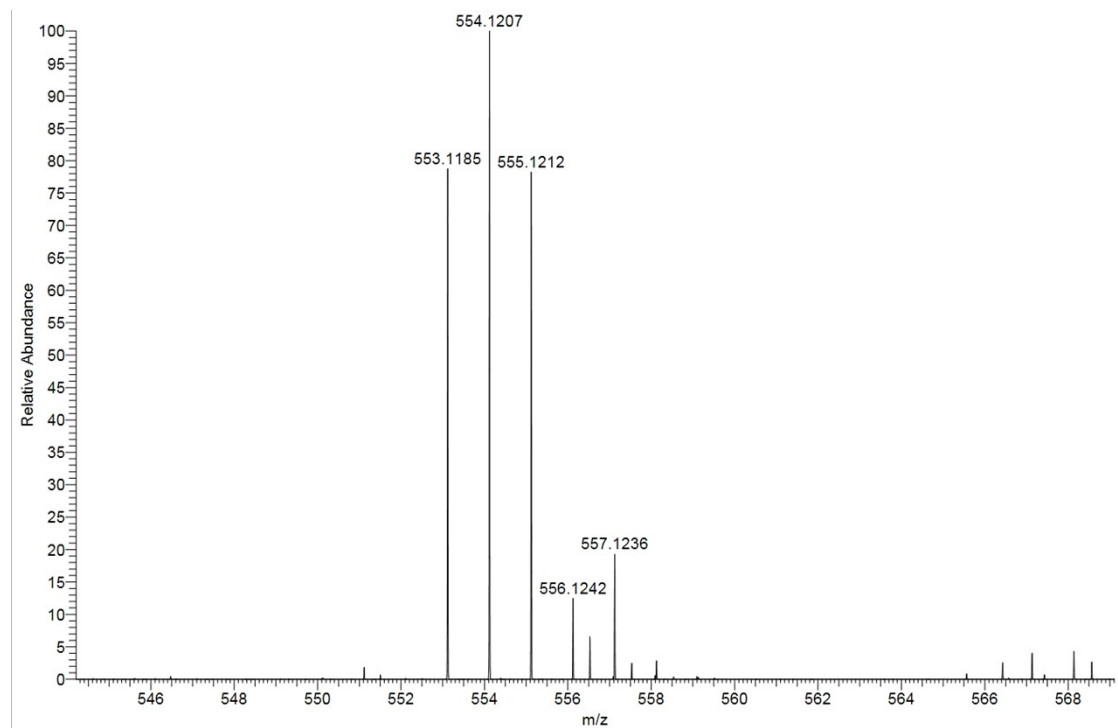

**Figure S17** HRMS spectrum for complex 3.

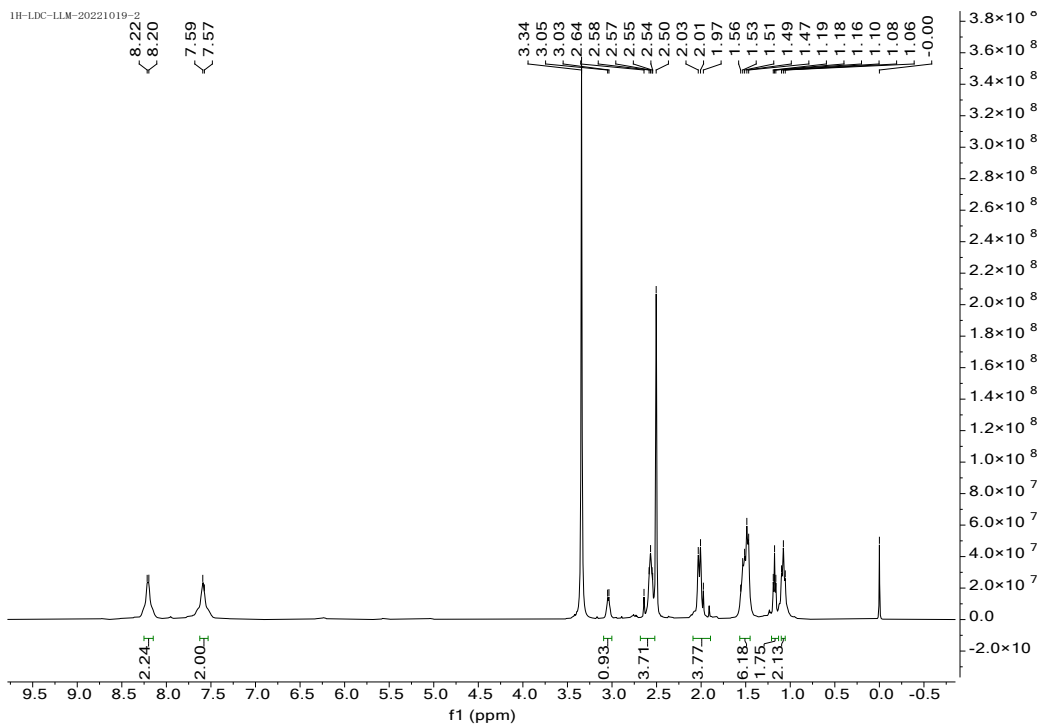

Figure S18 <sup>1</sup>H NMR spectrum for complex 4.

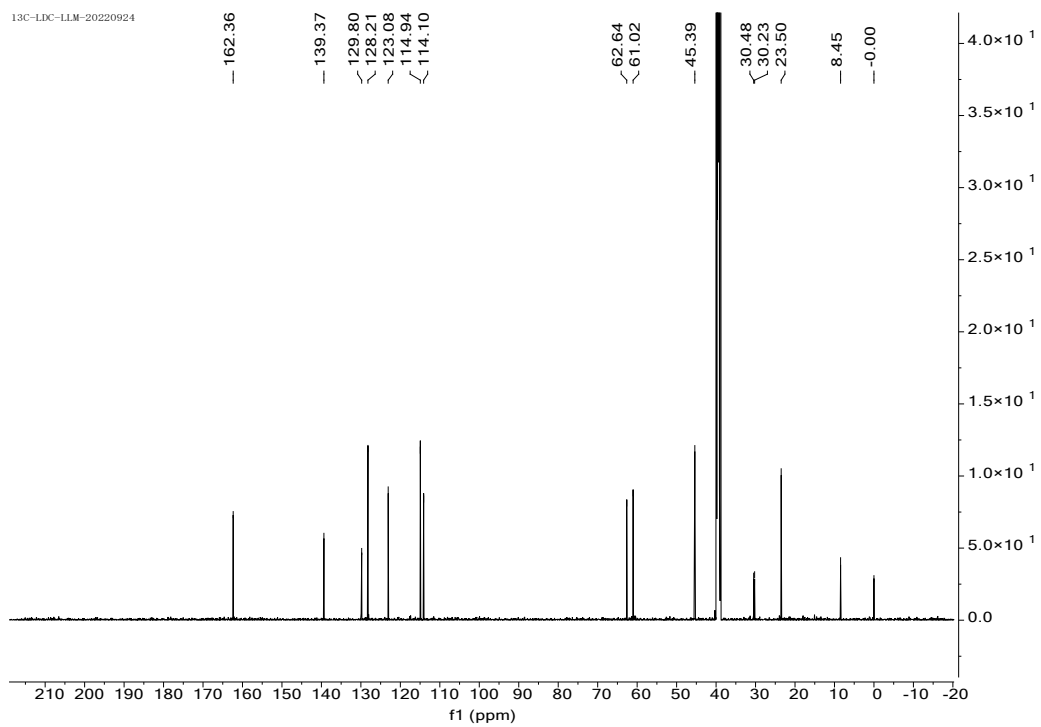

Figure S19 <sup>13</sup>C NMR spectrum for complex 4.

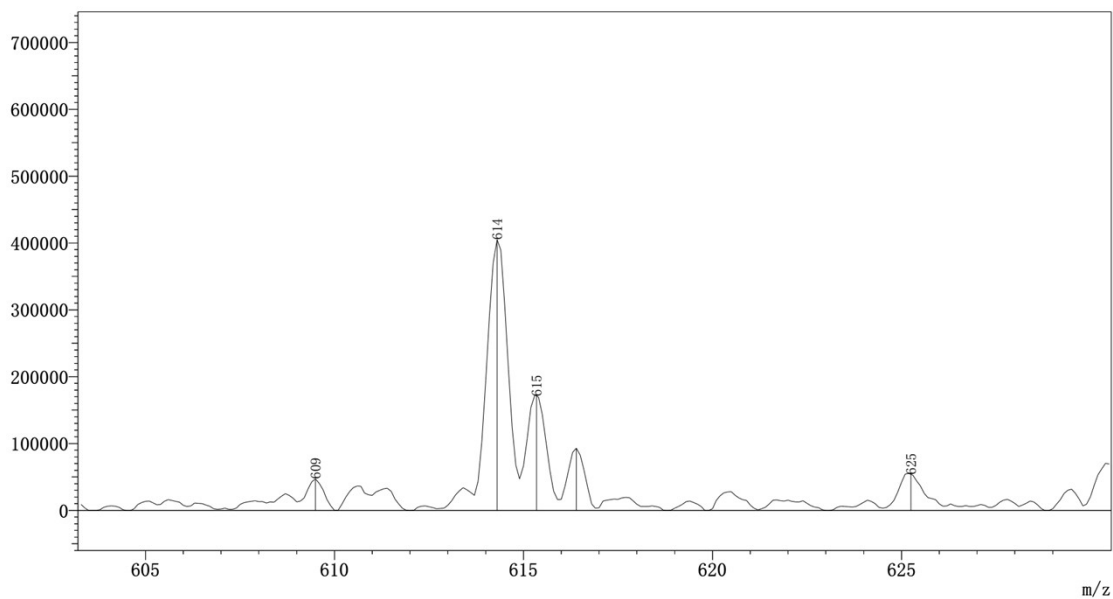

Figure S20 ESI-MS spectrum for complex 4.

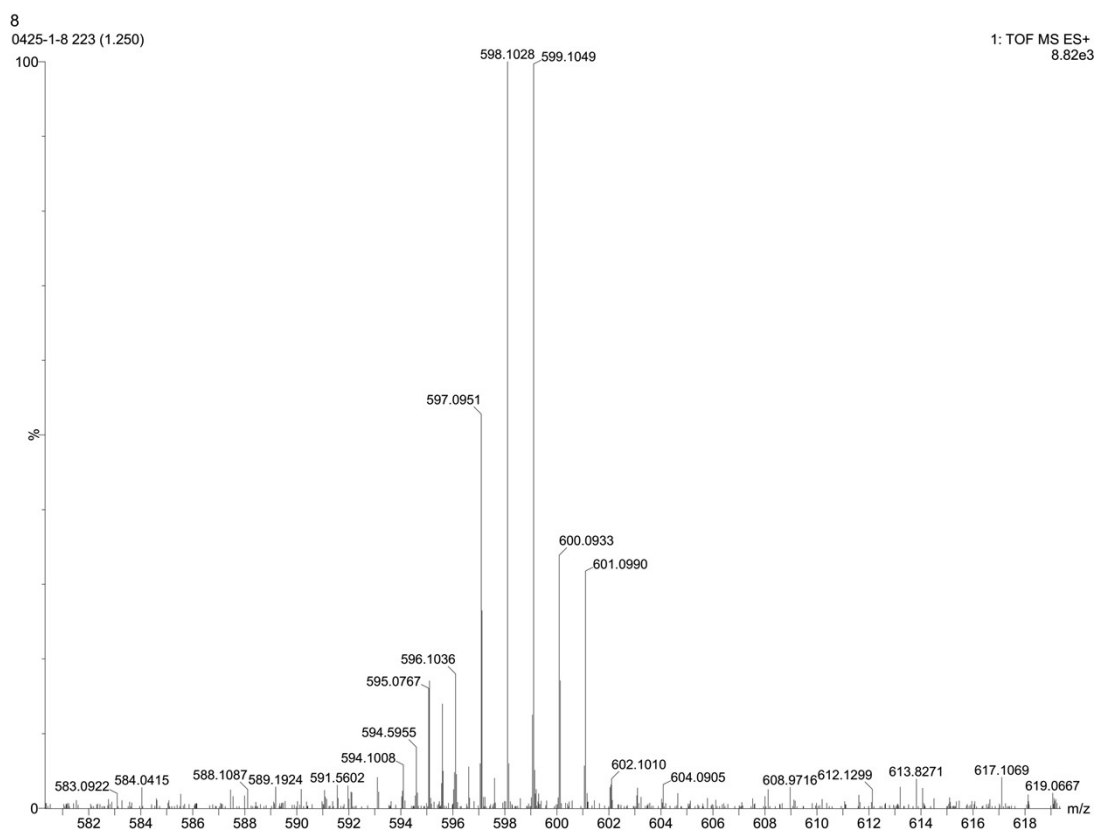

Figure S21 HRMS spectrum for complex 4.

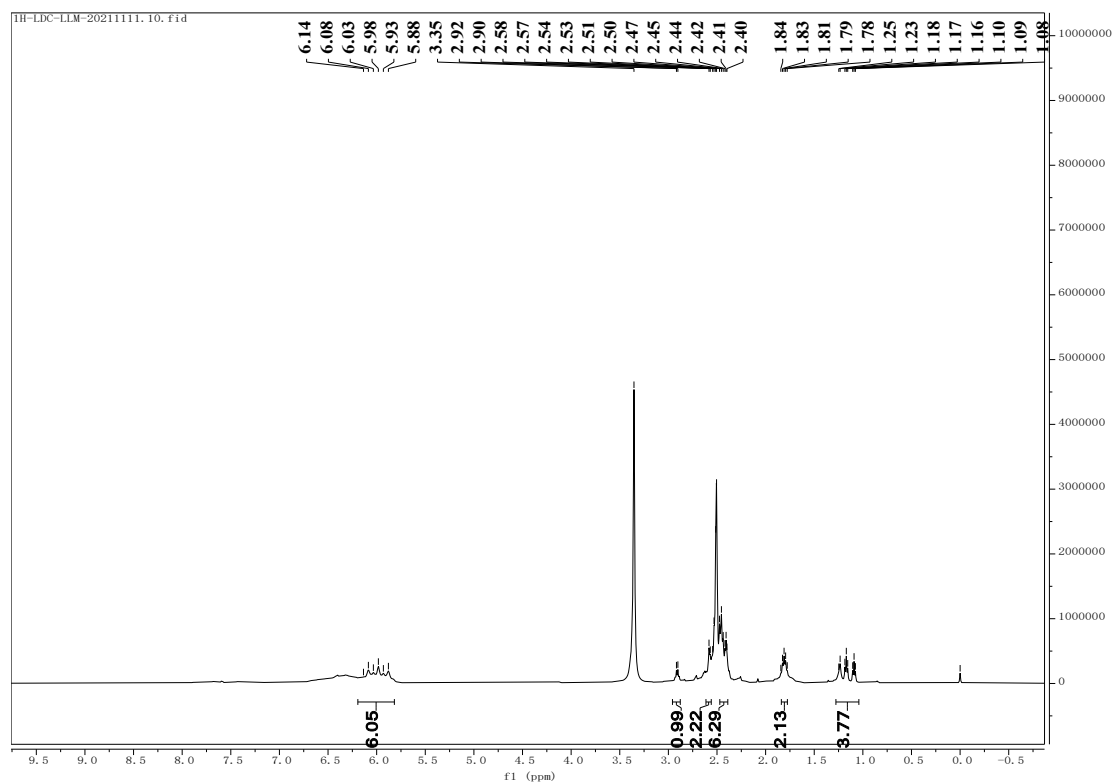

Figure S22 <sup>1</sup>H NMR spectrum for complex 5.

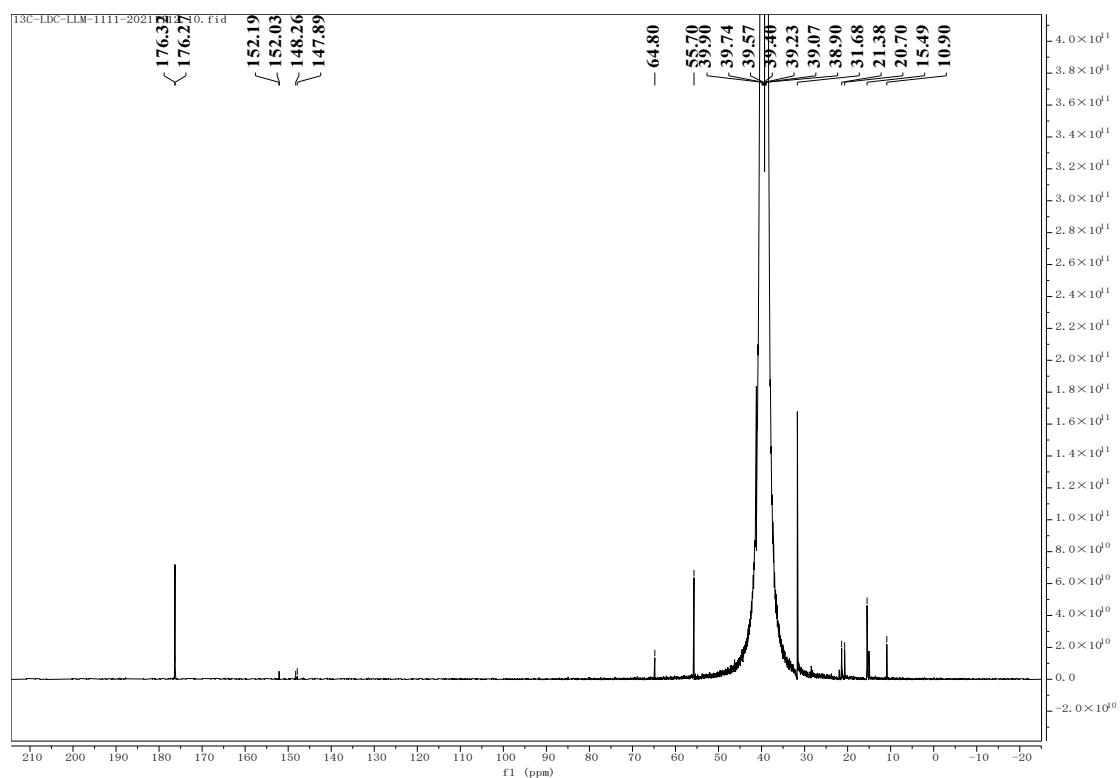

Figure S23 <sup>13</sup>C NMR spectrum for complex 5.

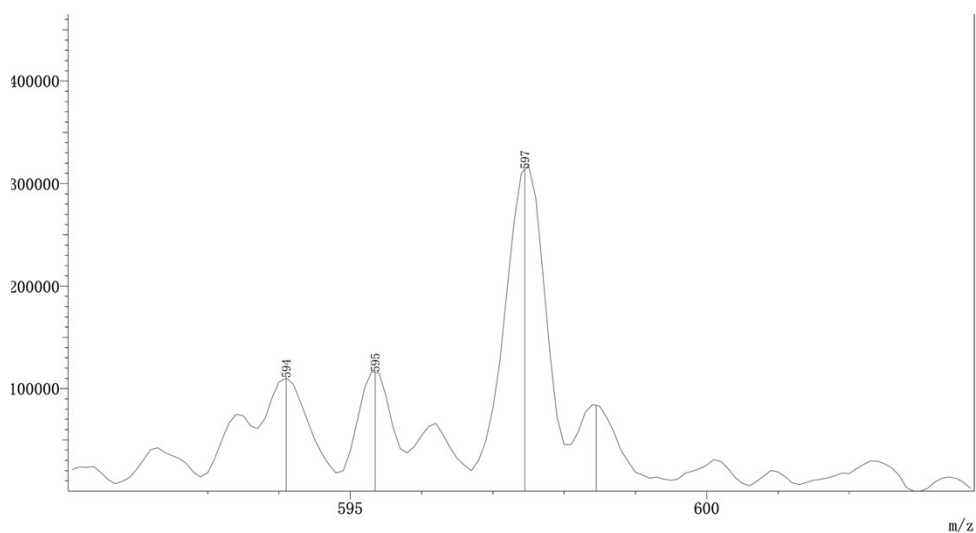

**Figure S24** ESI-MS spectrum for complex 5.

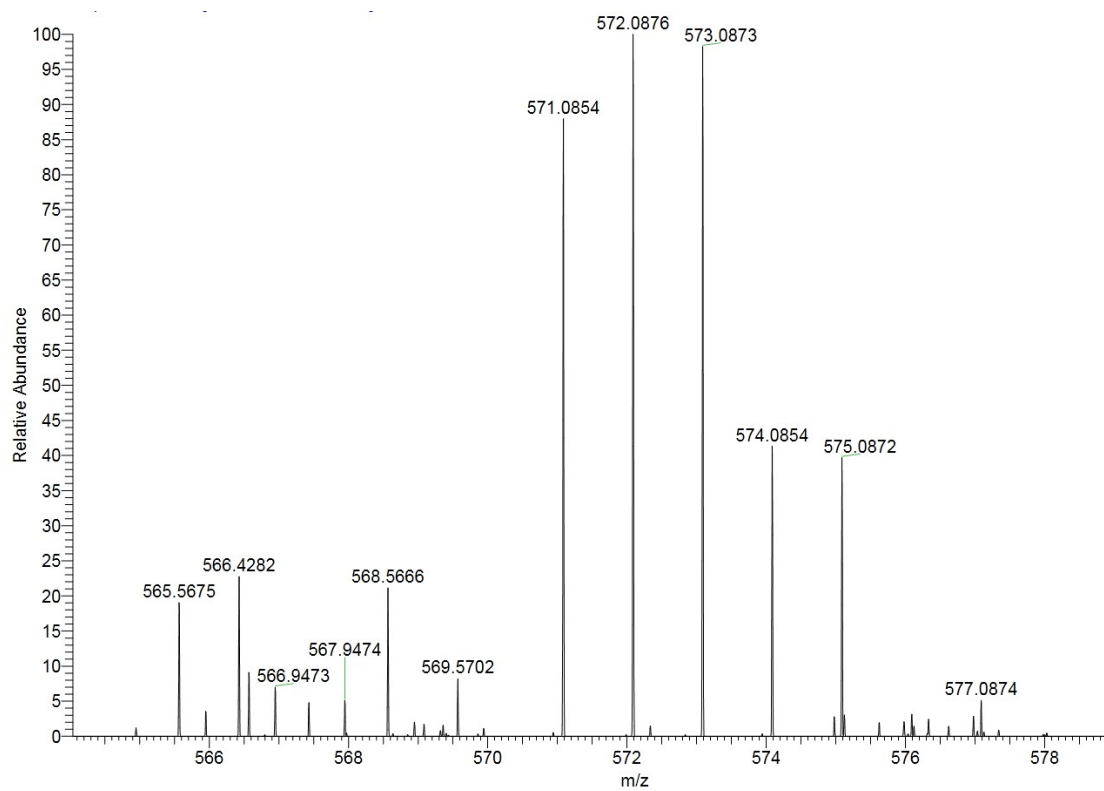

**Figure S25** HRMS spectrum for complex 5.

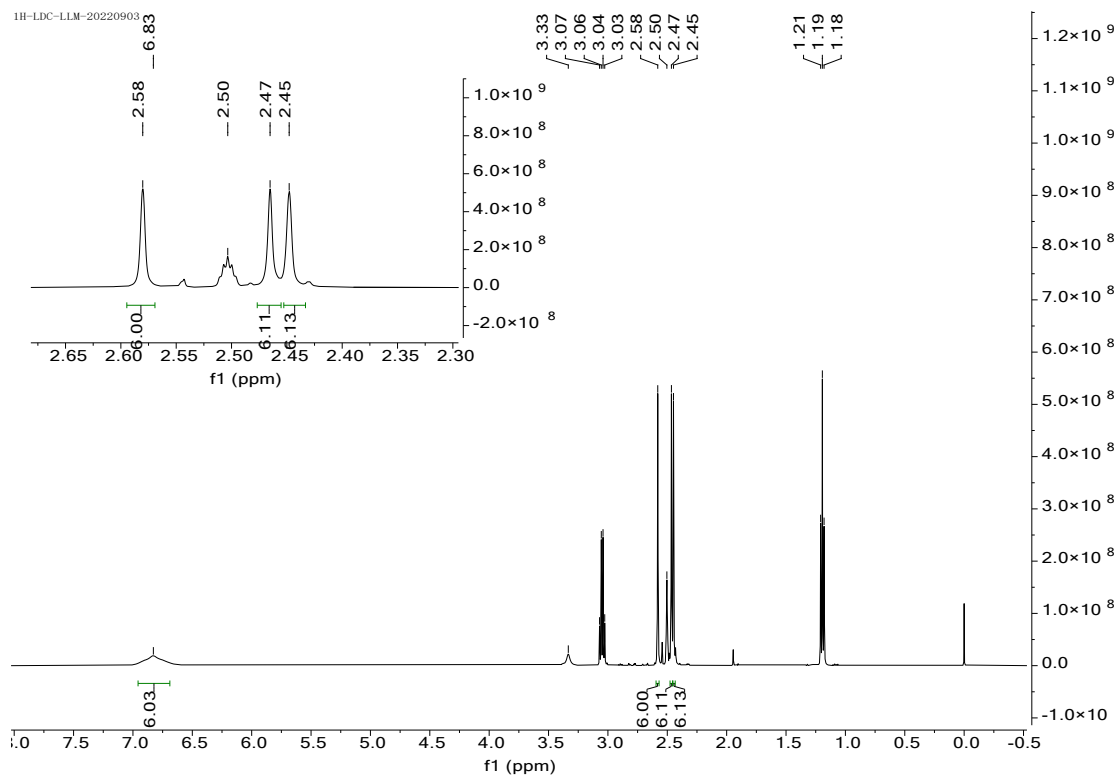

**Figure S26** <sup>1</sup>H NMR spectrum for complex **6**.

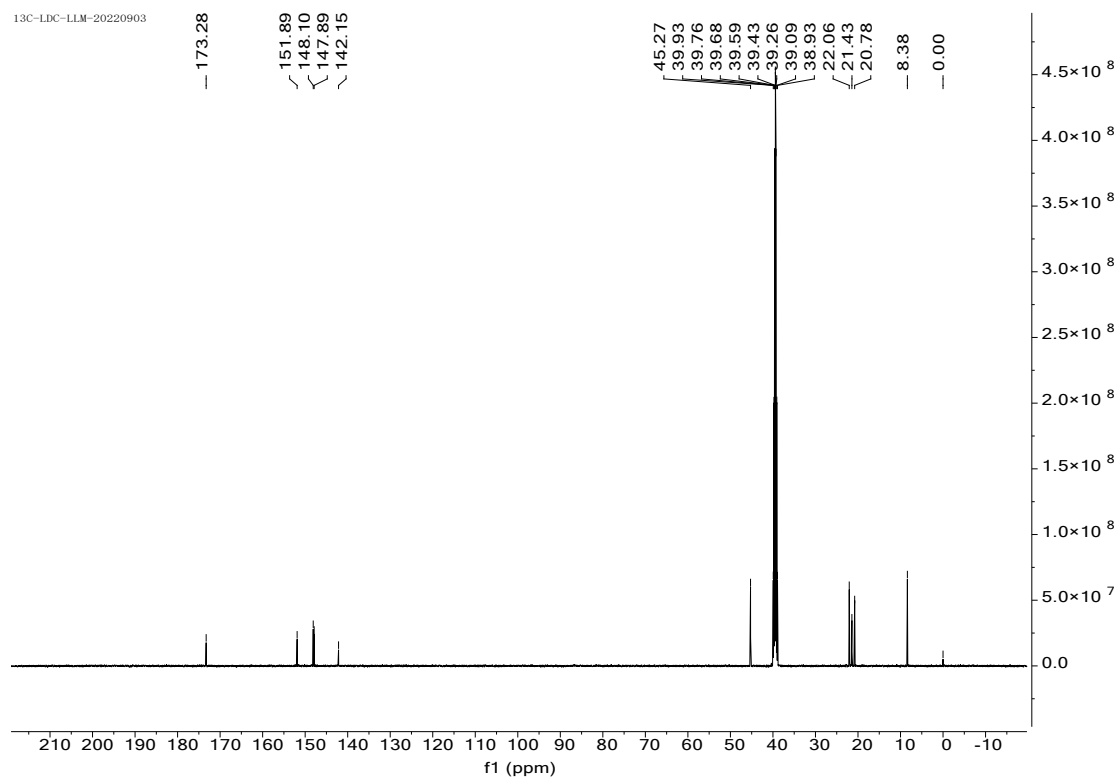

**Figure S27** <sup>13</sup>C NMR spectrum for complex **6**.



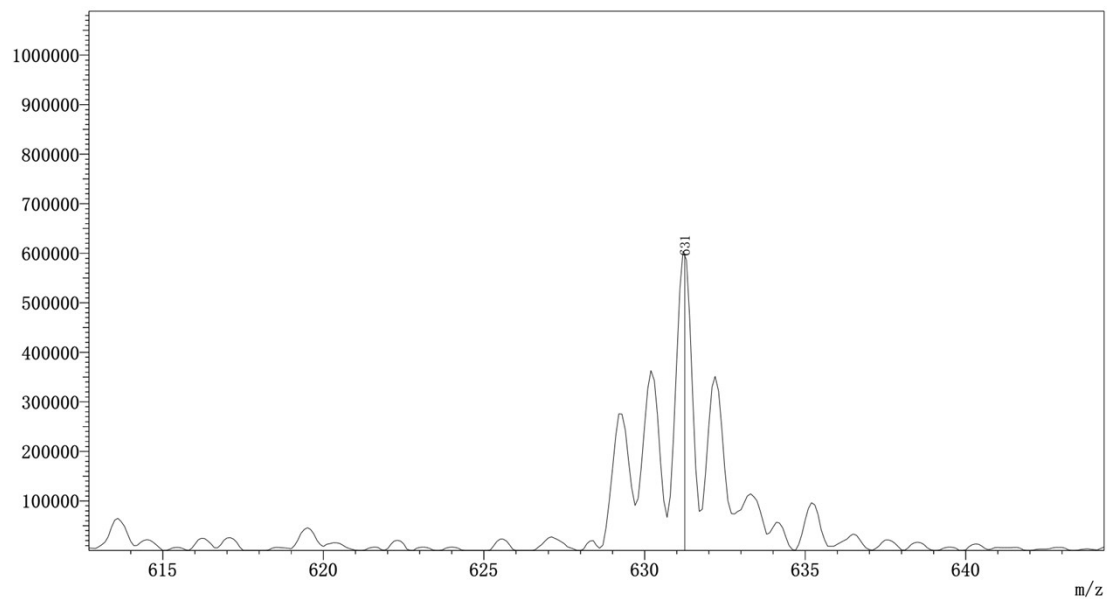

**Figure S28** ESI-MS spectrum for complex **6**.

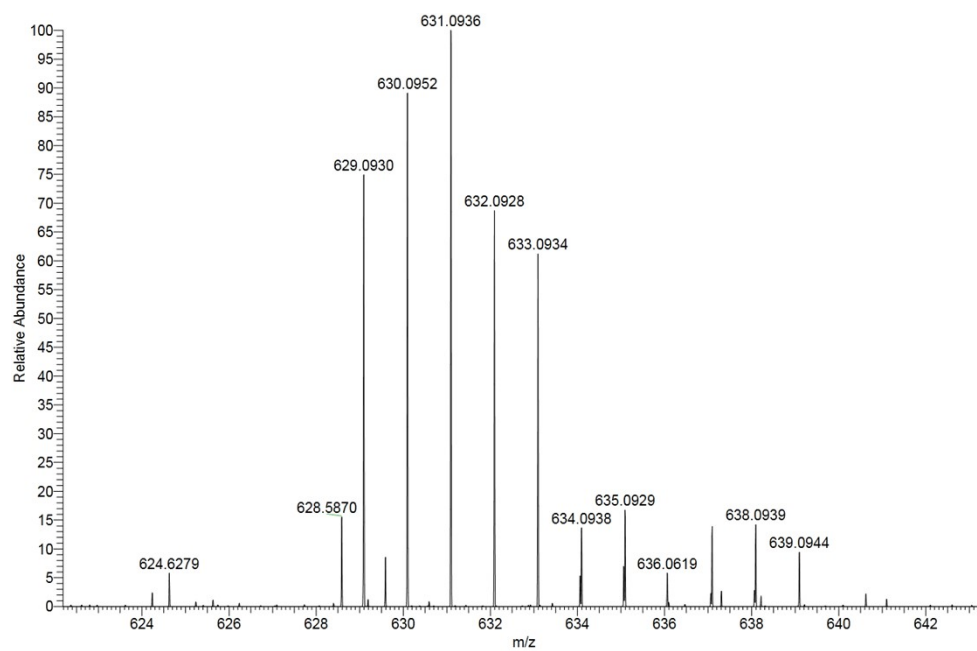

**Figure S29** HRMS spectrum for complex **6**.

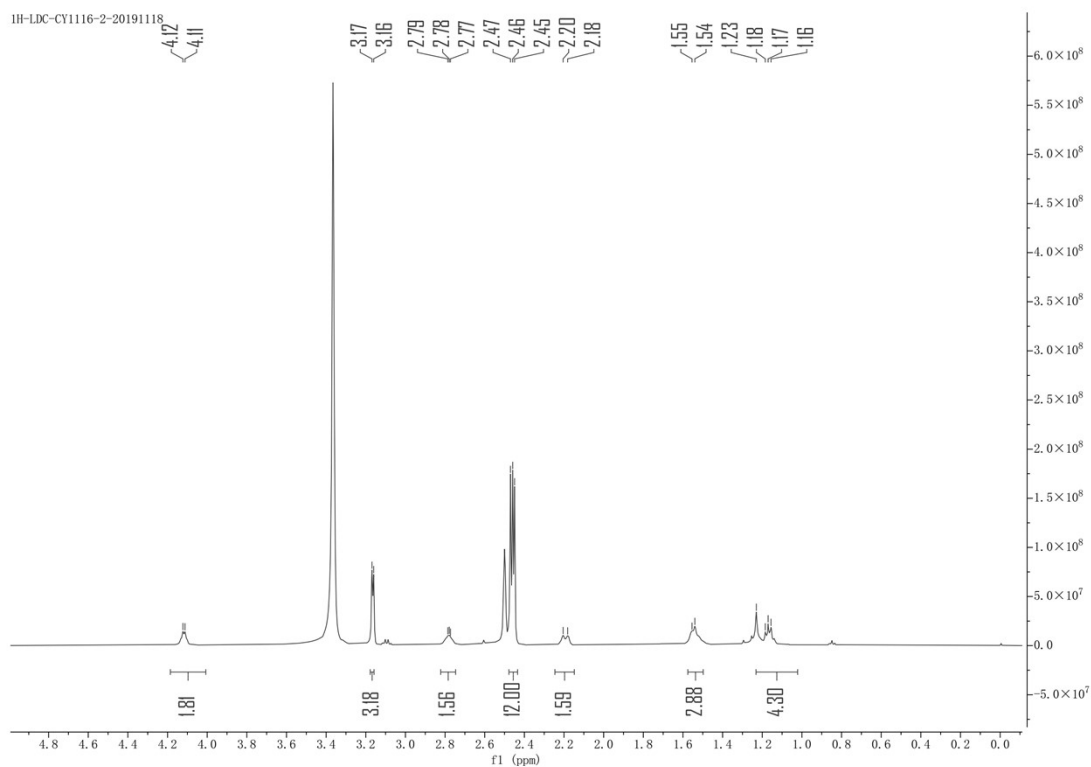

Figure S30 <sup>1</sup>H NMR spectrum for complex 7.

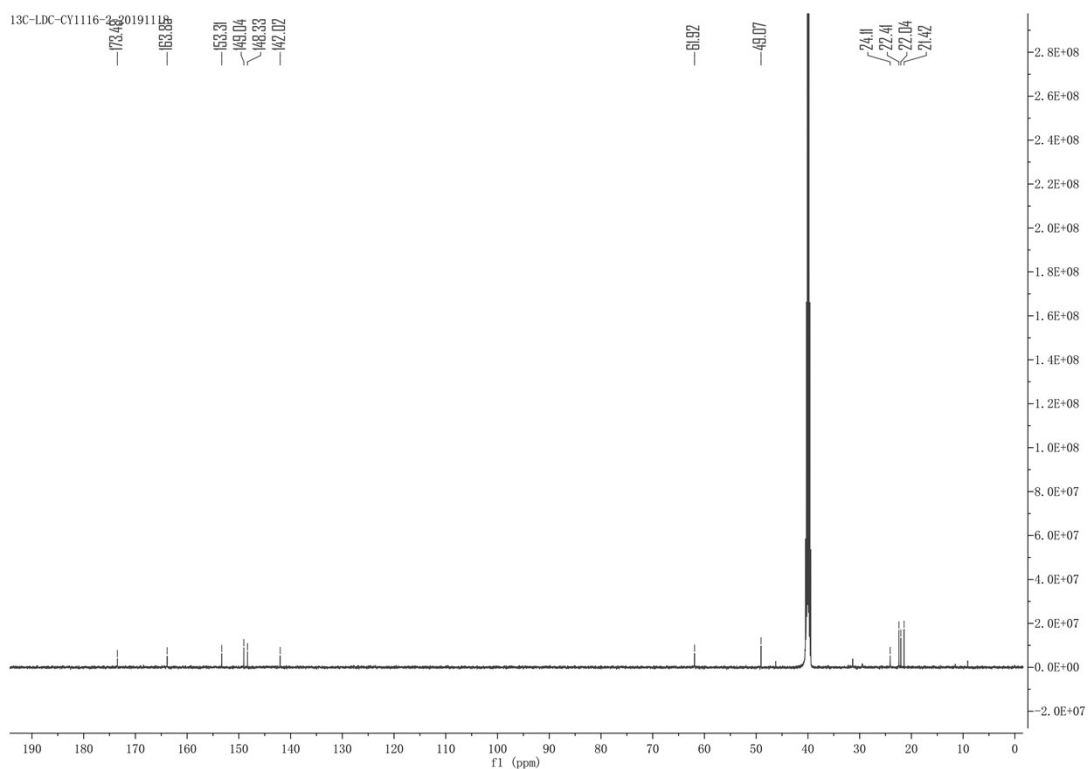

Figure S31 <sup>13</sup>C NMR spectrum for complex 7.

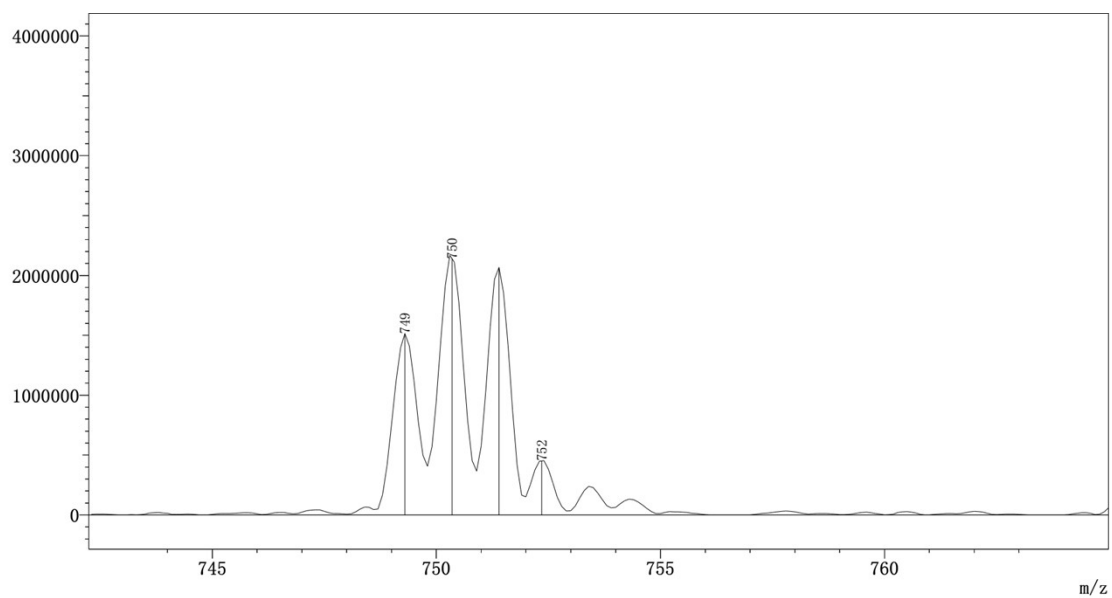

Figure S32 ESI-MS spectrum for complex 7.

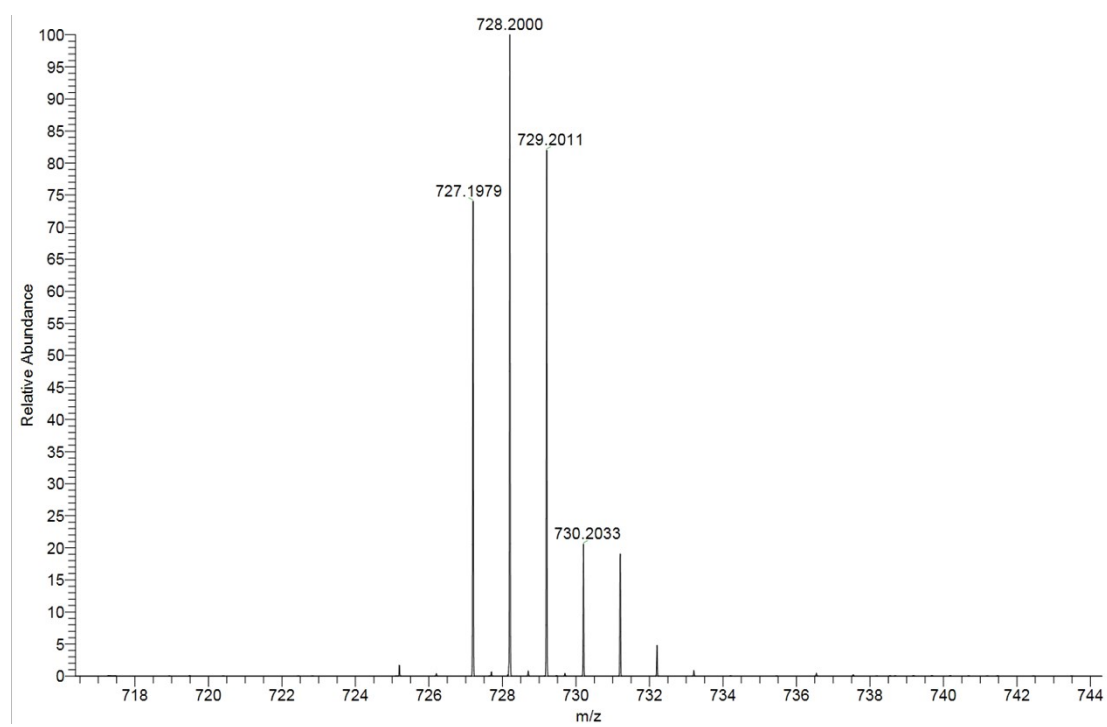

Figure S33 HRMS spectrum for complex 7.

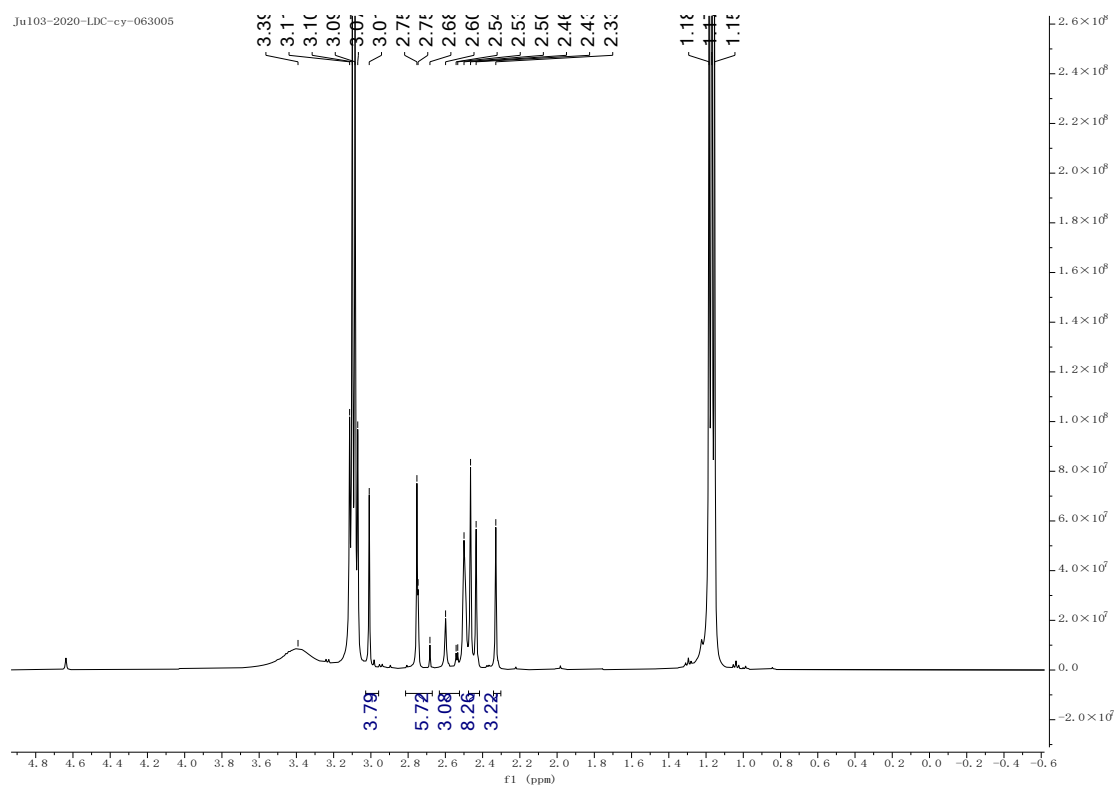

Peaks at 3.10 ppm (q) and 1.17 ppm (t) are ascribed to Et<sub>2</sub>O.

**Figure S34** <sup>1</sup>H NMR spectrum for complex **8**.

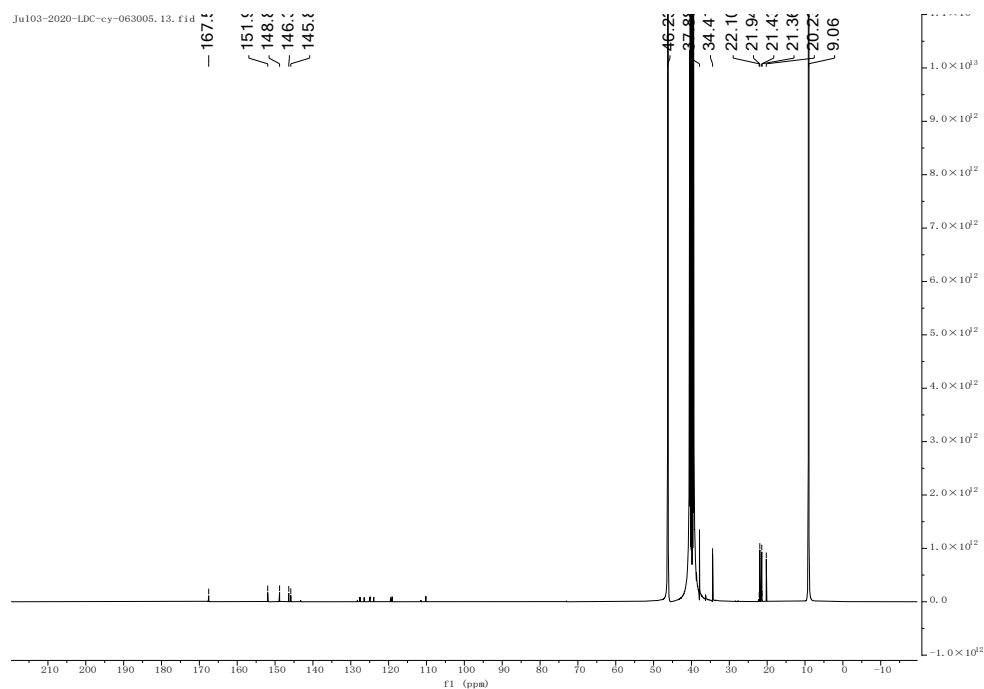

Peaks at 9.1 ppm and 46.2 ppm are ascribed to Et<sub>2</sub>O.

**Figure S35** <sup>13</sup>C NMR spectrum for complex **8**.

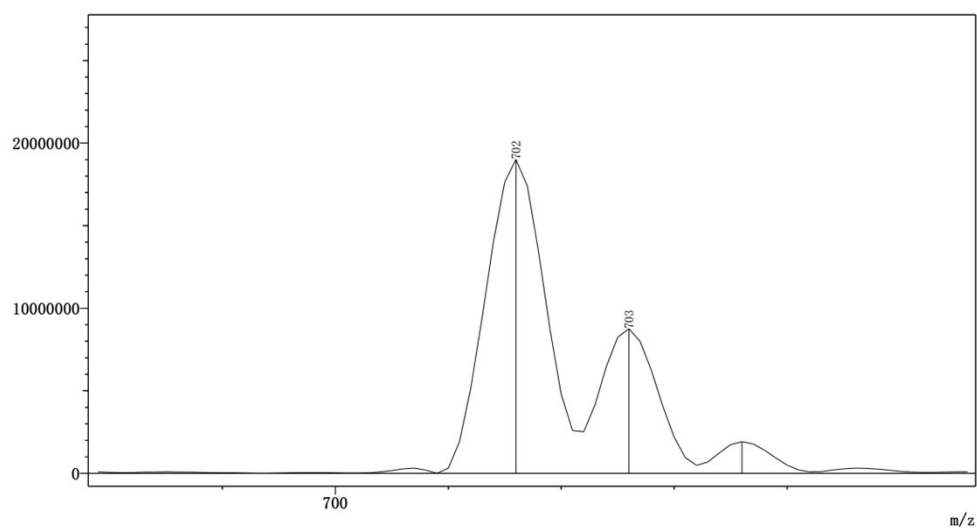

**Figure S36** ESI-MS spectrum for complex **8**.

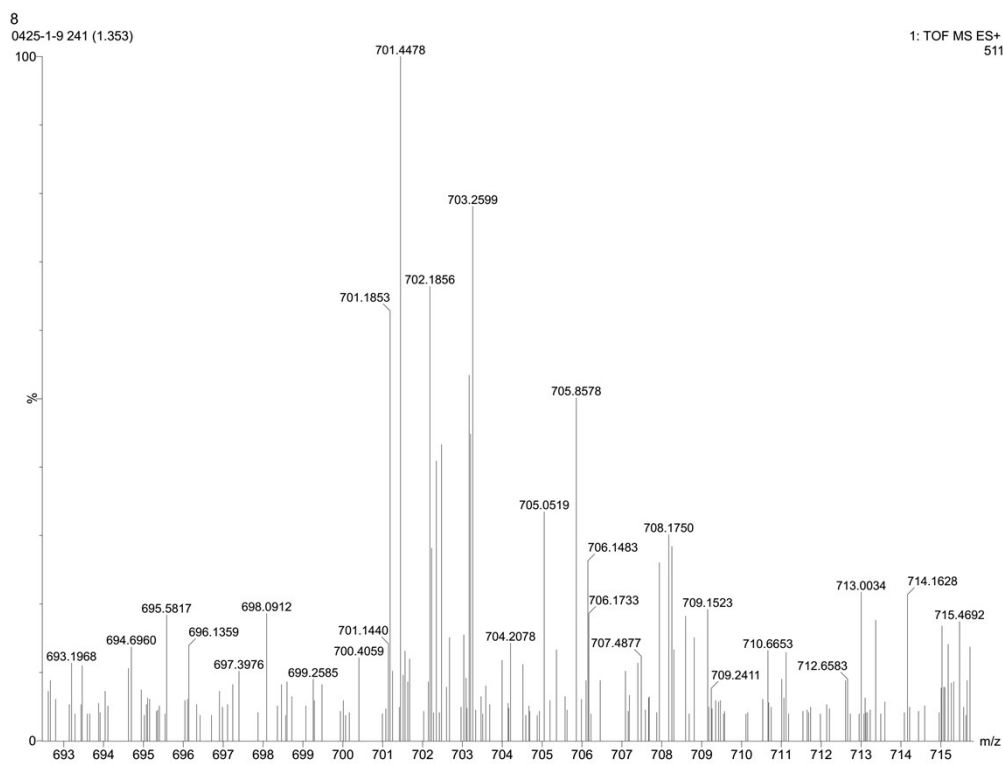

**Figure S37** HRMS spectrum for complex **8**.

## Reference

[S1] Q.P. Wang, Z.L. Huang, J. Ma, X.L. Lu, L. Zhang, X. Wang, P. G. Wang, *Dalton Trans.*, 2016, 45, 10366–10374.
